# Supplementary material
Source: PubMed Central journal article supplement (PMC8071657)
Supplement: mmc1.pdf [file mmc1.pdf]

## **Supplementary Methods**

A supplementary analysis of time to death/discharge to hospice according to ICU admission and the occurrence of all AKI, or AKI requiring dialysis was performed as follows: We fitted a competing risk model for the mortality or hospice outcome with time from first admission as the start point. We considered discharge from hospital to be a competing risk [1], since mortality data are limited after that point unless the patient is readmitted to our system. Patients still in hospital as of 24 August 2020 were counted as censored. The model was fitted with the R library cmprisk [2].

## **Supplementary Referencex**

- [1] Fine JP, Grey RJ. A proportional hazards model for the subdistribution of a competing risk. *J Am Stat Assoc* 1999;94:496-09doi:10.1080/01621459.1999.10474144.
- [2] Gray B cmprsk: Subdistribution Analysis of Competing Risks. R package version . 2020 2.2-10. <https://CRAN.R-project.org/package=cmprsk>

**Supplementary Table 1.** Patient characteristics by AKI stage

| <b>Characteristic</b>              | <b>Total</b><br>N = 4,732<br>N (%) or<br>median<br>(IQR) | <b>No AKI</b><br>N = 3346<br>N (%) or<br>median<br>(IQR) | <b>AKI Stage<br/>1</b><br>N = 717<br>N (%) or<br>median<br>(IQR) | <b>AKI Stage<br/>2</b><br>N=132<br>N (%) or<br>median<br>(IQR) | <b>AKI Stage<br/>3 without<br/>RRT,</b><br>N=300<br>N (%) or<br>median<br>(IQR) | <b>New RRT</b><br>N = 237<br>N (%) or<br>median<br>(IQR) |
|------------------------------------|----------------------------------------------------------|----------------------------------------------------------|------------------------------------------------------------------|----------------------------------------------------------------|---------------------------------------------------------------------------------|----------------------------------------------------------|
| Age, median, years                 | 65 (51, 76)                                              | 62 (48, 75)                                              | 71 (60, 82)                                                      | 68 (59.5, 78.5)                                                | 69.5 (61, 79)                                                                   | 63 (53, 71)                                              |
| Age, years                         |                                                          |                                                          |                                                                  |                                                                |                                                                                 |                                                          |
| 19-44                              | 805<br>(17.01)                                           | 701<br>(20.95)                                           | 62 (8.65)                                                        | 14 (10.61)                                                     | 10 (3.33)                                                                       | 15 (6.82)                                                |
| 45-54                              | 622<br>(13.14)                                           | 488<br>(14.58)                                           | 55 (7.67)                                                        | 8 (6.06)                                                       | 28 (9.33)                                                                       | 36 (16.36)                                               |
| 55-64                              | 916<br>(19.36)                                           | 647<br>(19.34)                                           | 117<br>(16.32)                                                   | 25 (18.94)                                                     | 62 (20.67)                                                                      | 65 (29.55)                                               |
| 65-74                              | 1056<br>(22.32)                                          | 652<br>(19.49)                                           | 196<br>(27.34)                                                   | 43 (32.58)                                                     | 87 (29.00)                                                                      | 75 (34.09)                                               |
| ≥75                                | 1333<br>(28.17)                                          | 858<br>(25.64)                                           | 287<br>(40.03)                                                   | 42 (31.82)                                                     | 113<br>(37.67)                                                                  | 29 (13.18)                                               |
| Male                               | 2702<br>(57.10)                                          | 1790<br>(53.5)                                           | 440<br>(61.37)                                                   | 81 (61.36)                                                     | 197<br>(65.67)                                                                  | 182<br>(82.73)                                           |
| Race/ethnicity                     |                                                          |                                                          |                                                                  |                                                                |                                                                                 |                                                          |
| Asian                              | 333 (7.04)                                               | 232 (6.93)                                               | 46 (6.42)                                                        | 9 (6.82)                                                       | 23 (7.67)                                                                       | 22 (10)                                                  |
| Non-Hispanic<br>African American   | 686<br>(14.50)                                           | 483<br>(14.44)                                           | 102<br>(14.23)                                                   | 17 (12.88)                                                     | 50 (16.67)                                                                      | 29 (13.18)                                               |
| Hispanic                           | 1291<br>(27.28)                                          | 945<br>(28.24)                                           | 167<br>(23.29)                                                   | 37 (28.03)                                                     | 67 (22.33)                                                                      | 70 (31.82)                                               |
| Other/ Multiracial                 | 337 (7.12)                                               | 243 (7.26)                                               | 45 (6.28)                                                        | 14 (10.61)                                                     | 20 (6.67)                                                                       | 15 (6.82)                                                |
| Unknown                            | 154 (3.25)                                               | 110 (3.29)                                               | 29 (4.04)                                                        | 1 (0.76)                                                       | 8 (2.67)                                                                        | 7 (3.18)                                                 |
| Non-Hispanic<br>white              | 1931<br>(40.81)                                          | 1333<br>(39.84)                                          | 328<br>(45.75)                                                   | 54 (40.91)                                                     | 132<br>(44.00)                                                                  | 77 (35)                                                  |
| Tobacco use                        |                                                          |                                                          |                                                                  |                                                                |                                                                                 |                                                          |
| Current                            | 283 (5.98)                                               | 205 (6.13)                                               | 47 (6.56)                                                        | 5 (3.79)                                                       | 13 (4.33)                                                                       | 12 (5.45)                                                |
| Former                             | 1019<br>(21.53)                                          | 670<br>(20.02)                                           | 208<br>(29.01)                                                   | 32 (24.24)                                                     | 75 (25.00)                                                                      | 32 (14.55)                                               |
| Never                              | 2717<br>(57.42)                                          | 1992<br>(59.53)                                          | 357<br>(49.79)                                                   | 76 (57.58)                                                     | 151<br>(50.33)                                                                  | 128<br>(58.18)                                           |
| Unknown                            | 713<br>(15.07)                                           | 479<br>(14.32)                                           | 105<br>(14.64)                                                   | 19 (14.39)                                                     | 61 (20.33)                                                                      | 48 (21.82)                                               |
| Obesity                            |                                                          |                                                          |                                                                  |                                                                |                                                                                 |                                                          |
| BMI <25 kg/m <sup>2</sup>          | 1087<br>(22.97)                                          | 768<br>(22.95)                                           | 192<br>(26.78)                                                   | 22 (16.67)                                                     | 64 (21.33)                                                                      | 35 (15.91)                                               |
| BMI 25 to <30<br>kg/m <sup>2</sup> | 1557<br>(32.90)                                          | 1100<br>(32.88)                                          | 233 (32.5)                                                       | 49 (37.12)                                                     | 109<br>(36.33)                                                                  | 63 (28.64)                                               |
| BMI 30 to <40<br>kg/m <sup>2</sup> | 1551<br>(32.78)                                          | 1103<br>(32.96)                                          | 213<br>(29.71)                                                   | 49 (37.12)                                                     | 87 (29.00)                                                                      | 93 (42.27)                                               |
| BMI ≥40 kg/m <sup>2</sup>          | 384 (8.11)                                               | 248 (7.41)                                               | 63 (8.79)                                                        | 12 (9.09)                                                      | 31 (10.33)                                                                      | 28 (12.73)                                               |
| Unknown                            | 153 (3.23)                                               | 127 (3.8)                                                | 16 (2.23)                                                        | 0 (0)                                                          | 9 (3.00)                                                                        | 1 (0.45)                                                 |
| Any chronic<br>condition*          | 3857<br>(81.51)                                          | 2609<br>(77.97)                                          | 651<br>(90.79)                                                   | 121<br>(91.67)                                                 | 271<br>(90.33)                                                                  | 178<br>(80.91)                                           |

| <b>Characteristic</b>                            | <b>Total</b><br>N = 4,732<br>N (%) or<br>median<br>(IQR) | <b>No AKI</b><br>N = 3346<br>N (%) or<br>median<br>(IQR) | <b>AKI Stage<br/>1</b><br>N = 717<br>N (%) or<br>median<br>(IQR) | <b>AKI Stage<br/>2</b><br>N=132<br>N (%) or<br>median<br>(IQR) | <b>AKI Stage<br/>3 without<br/>RRT,</b><br>N=300<br>N (%) or<br>median<br>(IQR) | <b>New RRT</b><br>N = 237<br>N (%) or<br>median<br>(IQR) |
|--------------------------------------------------|----------------------------------------------------------|----------------------------------------------------------|------------------------------------------------------------------|----------------------------------------------------------------|---------------------------------------------------------------------------------|----------------------------------------------------------|
| Coronary artery disease                          | 707<br>(14.94)                                           | 410<br>(12.25)                                           | 165<br>(23.01)                                                   | 29 (21.97)                                                     | 64 (21.33)                                                                      | 35 (15.91)                                               |
| Heart failure                                    | 488<br>(10.31)                                           | 249 (7.44)                                               | 153<br>(21.34)                                                   | 26 (19.7)                                                      | 42 (14.00)                                                                      | 13 (5.91)                                                |
| Hyperlipidemia                                   | 2052<br>(43.36)                                          | 1341<br>(40.08)                                          | 376<br>(52.44)                                                   | 75 (56.82)                                                     | 154<br>(51.33)                                                                  | 92 (41.82)                                               |
| Hypertension                                     | 2738<br>(57.86)                                          | 1736<br>(51.88)                                          | 537 (74.9)                                                       | 98 (74.24)                                                     | 209<br>(69.67)                                                                  | 140<br>(63.64)                                           |
| Diabetes                                         | 1646<br>(34.78)                                          | 1054<br>(31.5)                                           | 312<br>(43.51)                                                   | 52 (39.39)                                                     | 133<br>(44.33)                                                                  | 88 (40)                                                  |
| Asthma or chronic obstructive pulmonary disorder | 815<br>(17.22)                                           | 555<br>(16.59)                                           | 144<br>(20.08)                                                   | 23 (17.42)                                                     | 61 (20.33)                                                                      | 26 (11.82)                                               |
| Chronic kidney disease                           | 761<br>(16.08)                                           | 343<br>(10.25)                                           | 218 (30.4)                                                       | 41 (31.06)                                                     | 86 (28.67)                                                                      | 57 (25.91)                                               |
| Cancer                                           | 582<br>(12.30)                                           | 377<br>(11.27)                                           | 104 (14.5)                                                       | 30 (22.73)                                                     | 47 (15.67)                                                                      | 23 (10.45)                                               |
| Oxygen saturation ≤88 percent at presentation    | 601<br>(12.70)                                           | 271 (8.1)                                                | 134<br>(18.69)                                                   | 36 (27.27)                                                     | 85 (28.33)                                                                      | 75 (34.09)                                               |
| Systolic blood pressure < 100 at presentation    | 289 (6.11)                                               | 185 (5.53)                                               | 161<br>(22.45)                                                   | 40 (30.3)                                                      | 75 (25.00)                                                                      | 8 (3.64)                                                 |
| First urinalysis                                 |                                                          |                                                          |                                                                  |                                                                |                                                                                 |                                                          |
| RBC, n(%)                                        |                                                          |                                                          |                                                                  |                                                                |                                                                                 |                                                          |
| Missing                                          | 2282                                                     | 1954                                                     | 203                                                              | 25                                                             | 64                                                                              | 31                                                       |
| Large                                            | 254<br>(10.37)                                           | 104 (3.11)                                               | 55 (7.67)                                                        | 21 (15.91)                                                     | 33 (11.00)                                                                      | 40 (21.16)                                               |
| Moderate                                         | 348<br>(14.20)                                           | 157 (4.69)                                               | 75 (10.46)                                                       | 17 (12.88)                                                     | 46 (15.33)                                                                      | 49 (25.93)                                               |
| Negative                                         | 1507<br>(61.51)                                          | 973<br>(29.08)                                           | 291<br>(40.59)                                                   | 56 (42.42)                                                     | 114<br>(38.00)                                                                  | 67 (35.45)                                               |
| Small                                            | 341<br>(13.92)                                           | 158 (4.72)                                               | 93 (12.97)                                                       | 13 (9.85)                                                      | 43 (14.33)                                                                      | 33 (17.46)                                               |
| WBC/hpf, mean, n(%)                              |                                                          |                                                          |                                                                  |                                                                |                                                                                 |                                                          |
| Missing                                          | 2282                                                     | 1954                                                     | 203                                                              | 25                                                             | 64                                                                              | 31                                                       |
| Large                                            | 168 (6.86)                                               | 102 (3.05)                                               | 37 (5.16)                                                        | 6 (4.55)                                                       | 17 (5.67)                                                                       | 6 (3.17)                                                 |
| Moderate                                         | 179 (7.31)                                               | 104 (3.11)                                               | 32 (4.46)                                                        | 8 (6.06)                                                       | 22 (7.33)                                                                       | 12 (6.35)                                                |
| Negative                                         | 1901<br>(77.59)                                          | 1074<br>(32.10)                                          | 402<br>(56.07)                                                   | 81 (61.36)                                                     | 180<br>(60.00)                                                                  | 154<br>(81.48)                                           |
| Small                                            | 202 (8.24)                                               | 112 (3.35)                                               | 43 (6.00)                                                        | 12 (9.09)                                                      | 17 (5.67)                                                                       | 17 (8.99)                                                |
| Urine protein                                    |                                                          |                                                          |                                                                  |                                                                |                                                                                 |                                                          |
| Missing                                          | 2259                                                     | 1933                                                     | 200                                                              | 25                                                             | 65                                                                              | 31                                                       |
| Large                                            | 206 (8.33)                                               | 92 (2.75)                                                | 48 (6.69)                                                        | 11 (8.33)                                                      | 25 (8.33)                                                                       | 26 (13.76)                                               |
| Moderate                                         | 683<br>(27.62)                                           | 352<br>(10.52)                                           | 131<br>(18.27)                                                   | 33 (25.00)                                                     | 81 (27.00)                                                                      | 84 (44.44)                                               |

| <b>Characteristic</b>              | <b>Total</b><br>N = 4,732<br>N (%) or<br>median<br>(IQR) | <b>No AKI</b><br>N = 3346<br>N (%) or<br>median<br>(IQR) | <b>AKI Stage<br/>1</b><br>N = 717<br>N (%) or<br>median<br>(IQR) | <b>AKI Stage<br/>2</b><br>N=132<br>N (%) or<br>median<br>(IQR) | <b>AKI Stage<br/>3 without<br/>RRT,</b><br>N=300<br>N (%) or<br>median<br>(IQR) | <b>New RRT</b><br>N = 237<br>N (%) or<br>median<br>(IQR) |
|------------------------------------|----------------------------------------------------------|----------------------------------------------------------|------------------------------------------------------------------|----------------------------------------------------------------|---------------------------------------------------------------------------------|----------------------------------------------------------|
| Negative                           | 860<br>(34.78)                                           | 561<br>(16.77)                                           | 182<br>(25.38)                                                   | 32 (24.24)                                                     | 55 (18.33)                                                                      | 29 (15.34)                                               |
| Small                              | 724<br>(29.28)                                           | 408<br>(12.19)                                           | 156<br>(21.76)                                                   | 31 (23.48)                                                     | 74 (24.67)                                                                      | 50 (26.46)                                               |
| D-dimer, N, median<br>(IQR)        | 4158,<br>422.5<br>(247, 846)                             | 2853, 380<br>(223, 709)                                  | 664, 525.5<br>(303,<br>1129)                                     | 126, 474<br>(307,<br>1307)                                     | 281, 585<br>(322,<br>1961)                                                      | 234, 558<br>(318,<br>1763)                               |
| Creatinine, N,<br>median (IQR)     | 4723,<br>0.989<br>(0.79,<br>1.33)                        | 3339, 0.9<br>(0.75,<br>1.17)                             | 716, 1.27<br>(0.98,<br>1.79)                                     | 132, 1.14<br>(0.86,<br>1.60)                                   | 300, 1.27<br>(0.9, 2.33)                                                        | 236, 1.21<br>(0.9505,<br>2.09)                           |
| Sodium, N, median<br>(IQR)         | 4723, 137<br>(134, 140)                                  | 3339, 137<br>(134, 140)                                  | 716, 137<br>(133, 140)                                           | 132, 136<br>(133, 140)                                         | 300, 136<br>(132, 140)                                                          | 236, 135<br>(131.5,<br>139)                              |
| Potassium, N,<br>median (IQR)      | 4591, 4.<br>(3.7, 4.4)                                   | 3250, 4<br>(3.7, 4.4)                                    | 691, 4.2<br>(3.8, 4.6)                                           | 129, 4.1<br>(3.7, 4.5)                                         | 294, 4.2<br>(3.7, 4.6)                                                          | 227, 4.1<br>(3.7, 4.6)                                   |
| Bicarbonate, N,<br>median (IQR)    | 4721, 24<br>(21, 26)                                     | 3338, 24<br>(22, 26)                                     | 716, 23<br>(20,                                                  | 131, 23<br>(20,                                                | 300, 22<br>(19,                                                                 | 236, 22<br>(19.5, 25)                                    |
| CK, N, median<br>(IQR)             | 3270, 136<br>(62, 327)                                   | 2109, 114<br>(57, 277)                                   | 563, 152<br>(64, 381)                                            | 115, 171<br>(80, 481)                                          | 259, 183<br>(80, 429)                                                           | 224, 268.5<br>(120.5,<br>578.5)                          |
| IL-6, N, median<br>(IQR)           | 2710, 11.2<br>(5, 31)                                    | 1684, 8 (5,<br>19)                                       | 499, 18.3<br>(7, 50)                                             | 98, 17.5<br>(6, 45)                                            | 227, 24<br>(10, 64)                                                             | 202, 32.5<br>(15, 92)                                    |
| CRP, median (IQR)                  | 4353, 95.7<br>(38.79,<br>161)                            | 3005,<br>82.96<br>(31.1, 147)                            | 690,<br>110.17<br>(46.5,<br>179.2)                               | 127, 126<br>(66.7,<br>187.6)                                   | 294,<br>138.19<br>(83.3,<br>211.1)                                              | 237, 148.8<br>(93.45,<br>210)                            |
| Use of high flow<br>oxygen         | 321 (6.78)                                               | 216 (6.46)                                               | 78 (10.88)                                                       | 5 (3.79)                                                       | 17 (5.67)                                                                       | 2 (0.91)                                                 |
| Mechanical<br>ventilation          | 876<br>(18.51)                                           | 133 (3.97)                                               | 248<br>(34.59)                                                   | 79 (59.85)                                                     | 205<br>(68.33)                                                                  | 208<br>(94.55)                                           |
| ECMO                               | 48 (1.01)                                                | 3 (0.09)                                                 | 24 (3.35)                                                        | 6 (4.55)                                                       | 1 (0.33)                                                                        | 12 (5.45)                                                |
| Median length of<br>stay           | 6 (3, 11)                                                | 5 (3, 8)                                                 | 11 (6, 21)                                                       | 12 (6, 28)                                                     | 10 (6, 19)                                                                      | 21 (11,<br>40.5)                                         |
| Hospital day first<br>with any AKI | N/A                                                      | N/A                                                      | 3 (1, 6)                                                         | 3 (1, 6)                                                       | 3 (1, 5)                                                                        | 2 (1, 5)                                                 |
| Renal recovery*                    | N/A                                                      | N/A                                                      | 392 (83.9)                                                       | 41 (67.2)                                                      | 62 (75.6)                                                                       | 28 (41.2)                                                |
| Cessation of new<br>dialysis**     | N/A                                                      | N/A                                                      | N/A                                                              | N/A                                                            | N/A                                                                             | 41 (62.1)                                                |

\* Among patients not on chronic dialysis and who did not die or were not discharged to hospice

\*\*Among patients who did not die or were not discharged to hospice

The N is provided within each row for laboratory tests not done on all patients

**Supplementary Table 2.** Incidence of AKI according to admission week

| Characteristic        | <b>Total</b><br>N = 4,732<br>N (%) | <b>No AKI</b><br>N = 3346<br>N (%) | <b>Any AKI</b><br>N = 1,386<br>N (%) | <b>New RRT</b><br>N = 237<br>N (%) |
|-----------------------|------------------------------------|------------------------------------|--------------------------------------|------------------------------------|
| Week of admission     |                                    |                                    |                                      |                                    |
| 9 (March 2-8)         | 7 (0.15)                           | 3 (42.86)                          | 4 (57.14)                            | 0 (0)                              |
| 10 (March 9-15)       | 45 (0.95)                          | 29 (64.44)                         | 16 (35.56)                           | 5 (11.11)                          |
| 11 (March 16-22)      | 306 (6.47)                         | 195 (63.73)                        | 111 (36.27)                          | 27 (8.82)                          |
| 12 (March 23-29)      | 756 (15.98)                        | 513 (67.86)                        | 243 (32.14)                          | 46 (6.08)                          |
| 13 (March 30-April 5) | 1038 (21.94)                       | 709 (68.3)                         | 329 (31.7)                           | 66 (6.36)                          |
| 14 (April 6-April 12) | 763 (16.12)                        | 510 (66.84)                        | 253 (33.16)                          | 42 (5.5)                           |
| 15 (April 13-19)      | 476 (10.06)                        | 325 (68.28)                        | 151 (31.72)                          | 24 (5.04)                          |
| 16 (April 20-26)      | 280 (5.92)                         | 208 (74.29)                        | 72 (25.71)                           | 10 (3.57)                          |
| 17 (April 27-May 3)   | 185 (3.91)                         | 137 (74.05)                        | 48 (25.95)                           | 5 (2.7)                            |
| 18 (May 4-10)         | 155 (3.28)                         | 128 (82.58)                        | 27 (17.42)                           | 3 (1.94)                           |
| 19 (May 11-17)        | 124 (2.62)                         | 97 (78.23)                         | 27 (21.77)                           | 0 (0)                              |
| 20 (May 18-24)        | 69 (1.46)                          | 61 (88.41)                         | 8 (11.59)                            | 3 (4.35)                           |
| 21 (May 25-31)        | 64 (1.35)                          | 53 (82.81)                         | 11 (17.19)                           | 1 (1.56)                           |
| 22 (June 1-7)         | 57 (1.20)                          | 45 (78.95)                         | 12 (21.05)                           | 1 (1.75)                           |
| 23 (June 8-14)        | 31 (0.66)                          | 26 (83.87)                         | 5 (16.13)                            | 0 (0)                              |
| 24 (June 15-21)       | 38 (0.80)                          | 28 (73.68)                         | 10 (26.32)                           | 0 (0)                              |
| 25 (June 22-29)       | 38 (0.80)                          | 34 (89.47)                         | 4 (10.53)                            | 1 (2.63)                           |
| 26 (June 30-July 6)   | 49 (1.04)                          | 39 (79.59)                         | 10 (20.41)                           | 0 (0)                              |
| 27 (July 7-13)        | 48 (1.01)                          | 38 (79.17)                         | 10 (20.83)                           | 1 (2.08)                           |
| 28 (July 14-20)       | 38 (0.80)                          | 31 (81.58)                         | 7 (18.42)                            | 0 (0)                              |
| 29 (July 21-27)       | 34 (0.72)                          | 28 (82.35)                         | 6 (17.65)                            | 2 (5.88)                           |
| 30 (July 28-August 3) | 50 (1.06)                          | 42 (84)                            | 8 (16)                               | 0 (0)                              |
| 31 (August 4-10)      | 36 (0.76)                          | 30 (83.33)                         | 6 (16.67)                            | 0 (0)                              |
| 32 (August 11-17)     | 28 (0.59)                          | 22 (78.57)                         | 6 (21.43)                            | 0 (0)                              |
| 33 (August 18-24)     | 11 (0.23)                          | 10 (90.91)                         | 1 (9.09)                             | 0 (0)                              |
| 34 (August 19-25)     | 6 (0.13)                           | 5 (83.33)                          | 1 (16.67)                            | 0 (0)                              |

**Supplementary Table 3.** Risks of combined mortality and discharge to hospice according to AKI and initiation of RRT, by level of care

| AKI severity          | Non-ICU patients (N =3676 ) |                     |                |         | ICU patients (N =1056 ) |                     |                |         |
|-----------------------|-----------------------------|---------------------|----------------|---------|-------------------------|---------------------|----------------|---------|
|                       | n (%)                       |                     |                |         | n (%)                   |                     |                |         |
|                       | Discharged                  | Deceased or Hospice | Still Admitted | P value | Discharged              | Deceased or Hospice | Still Admitted | P value |
| No AKI                | 2844 (92.4)                 | 226 (7.3)           | 8 (0.3)        | <0.001  | 207 (77.2)              | 61 (22.8)           | 0 (0.0)        | <0.001  |
| AKI                   | 370 (61.9)                  | 226 (37.8)          | 2 (0.3)        |         | 295 (37.4)              | 482 (61.2)          | 11 (1.4)       |         |
| Hazard ratio (95% CI) | 5.88 (4.9 - 7.06)           |                     |                | <0.001  | 3.37 (2.54 - 4.46)      |                     |                | <0.001  |
| Never dialysis        | 3198 (87.6)                 | 444 (12.2)          | 10 (0.3)       | <0.001  | 452 (53.6)              | 382 (45.3)          | 9 (1.1)        | <0.001  |
| New dialysis          | 16 (66.7)                   | 8 (33.3)            | 0 (0.0)        |         | 50 (23.5)               | 161 (75.6)          | 2 (0.9)        |         |
| Hazard ratio (95% CI) | 2.75 (1.49 - 5.09)          |                     |                | 0.001   | 1.82 (1.55 - 2.14)      |                     |                | <0.001  |

**Supplementary Table 4.** Outcomes of AKI and of initiation of renal replacement therapy, by level of care

| AKI severity   | Non-ICU patients |                     |                |         | ICU patients |                     |                |         |
|----------------|------------------|---------------------|----------------|---------|--------------|---------------------|----------------|---------|
|                | Discharged       | Deceased or Hospice | Still Admitted | P value | Discharged   | Deceased or Hospice | Still Admitted | P value |
| No AKI         | 2844 (92.4)      | 226 (7.3)           | 8 (0.3)        | <0.001  | 207 (77.2)   | 61 (22.8)           | 0 (0.0)        | <0.001  |
| AKI stage 1    | 288 (68.1)       | 134 (31.7)          | 1 (0.2)        |         | 171 (58.2)   | 116 (39.5)          | 7 (2.4)        |         |
| AKI stage 2    | 24 (48.0)        | 25 (50.0)           | 1 (2.0)        |         | 36 (43.9)    | 46 (56.1)           | 0 (0.0)        |         |
| AKI stage 3    | 58 (46.4)        | 67 (53.6)           | 0 (0.0)        |         | 88 (21.4)    | 320 (77.7)          | 4 (1.0)        |         |
| Never dialysis | 3198 (87.6)      | 444 (12.2)          | 10 (0.3)       | <0.001  | 452 (53.6)   | 382 (45.3)          | 9 (1.1)        | <0.001  |
| New dialysis   | 16 (66.7)        | 8 (33.3)            | 0 (0.0)        |         | 50 (23.5)    | 161 (75.6)          | 2 (0.9)        |         |

**Supplementary Table 5.** Adjusted risk of death during hospital admission

|                         | <b>OR</b> | <b>95% CI</b> | <b>P</b> |
|-------------------------|-----------|---------------|----------|
| <b>Variable</b>         |           |               |          |
| AKI during admission    | 10.22     | 8.39-12.49    | <0.001   |
| Male sex                | 1.03      | 0.85-1.26     | 0.74     |
| Race                    |           |               |          |
| White                   | Ref       | --            | --       |
| Asian                   | 1.08      | 0.75-1.56     | 0.67     |
| Black                   | 0.62      | 0.45-0.83     | 0.002    |
| Hispanic                | 1.19      | 0.94-1.52     | 0.15     |
| Other/Multi-racial      | 1.13      | 0.78-1.64     | 0.51     |
| Unknown                 | 1.00      | 0.60-1.64     | 0.99     |
| Age, years              |           |               |          |
| 19-44                   | Ref       | --            | --       |
| 45-54                   | 2.46      | 1.50-4.11     | <0.001   |
| 55-64                   | 3.16      | 2.00-5.12     | <0.001   |
| 65-74                   | 5.00      | 3.19-8.07     | <0.001   |
| ≥75                     | 14.19     | 8.95-23.15    | <0.001   |
| Smoking                 |           |               |          |
| Never                   | Ref       | --            | --       |
| Current                 | 0.90      | 0.58-1.38     | 0.64     |
| Former                  | 1.14      | 0.91-1.43     | 0.27     |
| Unknown                 | 1.97      | 1.52-2.54     | <0.001   |
| Cancer                  | 1.68      | 1.30-2.17     | <0.001   |
| Chronic kidney disease  | 0.72      | 0.56-0.92     | 0.01     |
| Coronary artery disease | 0.87      | 0.67-1.13     | 0.30     |
| Diabetes                | 1.06      | 0.87-1.29     | 0.57     |
| Heart failure           | 1.69      | 1.31-2.18     | <0.001   |
| Hyperlipidemia          | 0.80      | 0.65-0.99     | 0.04     |
| Hypertension            | 0.95      | 0.76-1.20     | 0.68     |



|                                     |      |           |        |
|-------------------------------------|------|-----------|--------|
| Pulmonary disease                   | 0.94 | 0.73-1.20 | 0.60   |
| BMI                                 |      |           |        |
| <25 kg/m <sup>2</sup>               | Ref  | --        | --     |
| 25 to <30 kg/m <sup>2</sup>         | 0.86 | 0.67-1.10 | 0.22   |
| 30 to <40 kg/m <sup>2</sup>         | 1.06 | 0.82-1.38 | 0.64   |
| 40 kg/m <sup>2</sup>                | 1.25 | 0.85-1.84 | 0.25   |
| Unknown                             | 2.63 | 1.62-4.25 | <0.001 |
| Systolic blood pressure, mm mercury |      |           |        |
| 101-120                             | Ref  | --        | --     |
| <100                                | 1.75 | 1.21-2.51 | 0.003  |
| 121-160                             | 0.88 | 0.70-1.09 | 0.24   |
| >160                                | 0.71 | 0.50-1.01 | 0.06   |
| Oxygen Saturation, %                | 0.71 | 0.50-1.01 | 0.06   |
| 93-100                              | Ref  | --        | --     |
| 89-92                               | 1.72 | 1.37-2.15 | <0.001 |
| <88                                 | 2.94 | 2.29-3.76 | <0.001 |
| Temperature, degrees Celsius        |      |           |        |
| <37.0                               | Ref  | --        | --     |
| >39.0                               | 0.96 | 0.67-1.37 | 0.84   |
| 38.1-39.0                           | 1.22 | 0.92-1.62 | 0.17   |
| 37.5 - 38.0                         | 0.83 | 0.67-1.03 | 0.09   |
| D_Dimer, ng/mL                      |      |           |        |
| 0-250                               | Ref  | --        | --     |
| 251-500                             | 1.56 | 1.17-2.08 | 0.003  |
| 501-1000                            | 1.78 | 1.31-2.42 | <0.001 |
| 1001-2500                           | 1.85 | 1.28-2.69 | 0.001  |
| >2500                               | 2.71 | 1.93-3.83 | <0.001 |
| Missing                             | 1.77 | 1.15-2.74 | 0.01   |
| Date of Admit                       |      |           |        |
| 10 (March 9-15)                     | Ref  | --        | --     |
| 11 (March 16-22)                    | 1.31 | 0.56-3.17 | 0.54   |
| 12 (March 23-29)                    | 0.99 | 0.43-2.38 | 0.99   |

|                       |      |           |      |
|-----------------------|------|-----------|------|
| 13 (March 30-April 5) | 1.08 | 0.47-2.59 | 0.86 |
| 14 (April 6-April 12) | 0.90 | 0.39-2.16 | 0.80 |
| 15 (April 13-19)      | 0.80 | 0.34-1.95 | 0.61 |
| 16 (April 20-26)      | 0.62 | 0.25-1.58 | 0.31 |
| 17 (April 27-May 3)   | 0.51 | 0.20-1.36 | 0.17 |
| 18 (May 4-10)         | 0.40 | 0.14-1.12 | 0.08 |
| 19 (May 11-17)        | 0.31 | 0.10-0.90 | 0.03 |
| 20 (May 18-24)        | 0.66 | 0.17-2.36 | 0.54 |
| 21 (May 25-31)        | 0.05 | 0.00-0.29 | 0.01 |
| 22 (June 1-7)         | 0.40 | 0.11-1.42 | 0.16 |
| 23 (June 8-14)        | 0.32 | 0.04-1.76 | 0.23 |
| 24 (June 15-21)       | 0.05 | 0.00-0.35 | 0.01 |
| 25 (June 22-29)       | 0.00 | 0.00-0.00 | 0.98 |
| 26 (June 30-July 6)   | 0.10 | 0.01-0.50 | 0.01 |
| 27 (July 7-13)        | 0.00 | 0.00-0.00 | 0.97 |
| 28 (July 14-20)       | 0.55 | 0.12-2.18 | 0.41 |
| 29 (July 21-27)       | 0.15 | 0.01-1.07 | 0.10 |
| 30 (July 28-August 3) | 0.00 | 0.00-0.00 | 0.97 |
| 31 (August 4-10)      | 0.31 | 0.05-1.49 | 0.16 |
| 32 (August 11-17)     | 0.00 | 0.00-0.00 | 0.98 |
| 33 (August 18-24)     | 0.00 | 0.00-0.00 | 0.99 |
| 34 (August 19-25)     | 0.00 | 0.00-0.00 | 0.99 |

**Supplementary Table 6.** Adjusted risk of death among those requiring renal replacement therapy

|                         | <b>OR</b> | <b>95% CI</b> | <b>P</b> |
|-------------------------|-----------|---------------|----------|
| <b>Variable</b>         |           |               |          |
| Male sex                | 1.83      | 0.77-4.33     | 0.17     |
| Race                    |           |               |          |
| White                   | Ref       | --            | --       |
| Asian                   | 0.67      | 0.20-2.44     | 0.53     |
| Black                   | 0.58      | 0.20-1.69     | 0.31     |
| Hispanic                | 0.99      | 0.40-2.46     | 0.98     |
| Other/Multi-racial      | 0.92      | 0.22-4.86     | 0.91     |
| Unknown                 | 0.11      | 0.01-0.70     | 0.02     |
| Age, years              |           |               |          |
| 19-44                   | Ref       | --            | --       |
| 45-54                   | 1.22      | 0.27-5.14     | 0.79     |
| 55-64                   | 1.74      | 0.41-7.11     | 0.44     |
| 65-74                   | 3.39      | 0.76-14.87    | 0.10     |
| ≥75                     | 3.43      | 0.64-19.01    | 0.15     |
| Smoking                 |           |               |          |
| Never                   | Ref       | --            | --       |
| Current                 | 1.82      | 0.41-9.83     | 0.45     |
| Former                  | 2.40      | 0.83-7.71     | 0.12     |
| Unknown                 | 2.00      | 0.83-5.18     | 0.14     |
| Cancer                  | 5.56      | 1.48-29.08    | 0.02     |
| Chronic kidney disease  | 0.43      | 0.19-0.93     | 0.03     |
| Coronary artery disease | 0.32      | 0.11-0.88     | 0.03     |
| Diabetes                | 0.79      | 0.37-1.68     | 0.53     |
| Heart failure           | 2.43      | 0.54-12.45    | 0.26     |
| Hyperlipidemia          | 1.39      | 0.64-3.12     | 0.41     |
| Hypertension            | 0.29      | 0.11-0.73     | 0.01     |

|                             |      |            |       |
|-----------------------------|------|------------|-------|
| Pulmonary disease           | 1.14 | 0.36-3.79  | 0.82  |
| BMI                         |      |            |       |
| <25 kg/m <sup>2</sup>       | Ref  | --         | --    |
| 25 to <30 kg/m <sup>2</sup> | 1.92 | 0.73-5.18  | 0.19  |
| 30 to <40 kg/m <sup>2</sup> | 3.93 | 1.53-10.47 | 0.005 |
| ≥40 kg/m <sup>2</sup>       | 9.10 | 2.36-40.68 | 0.002 |

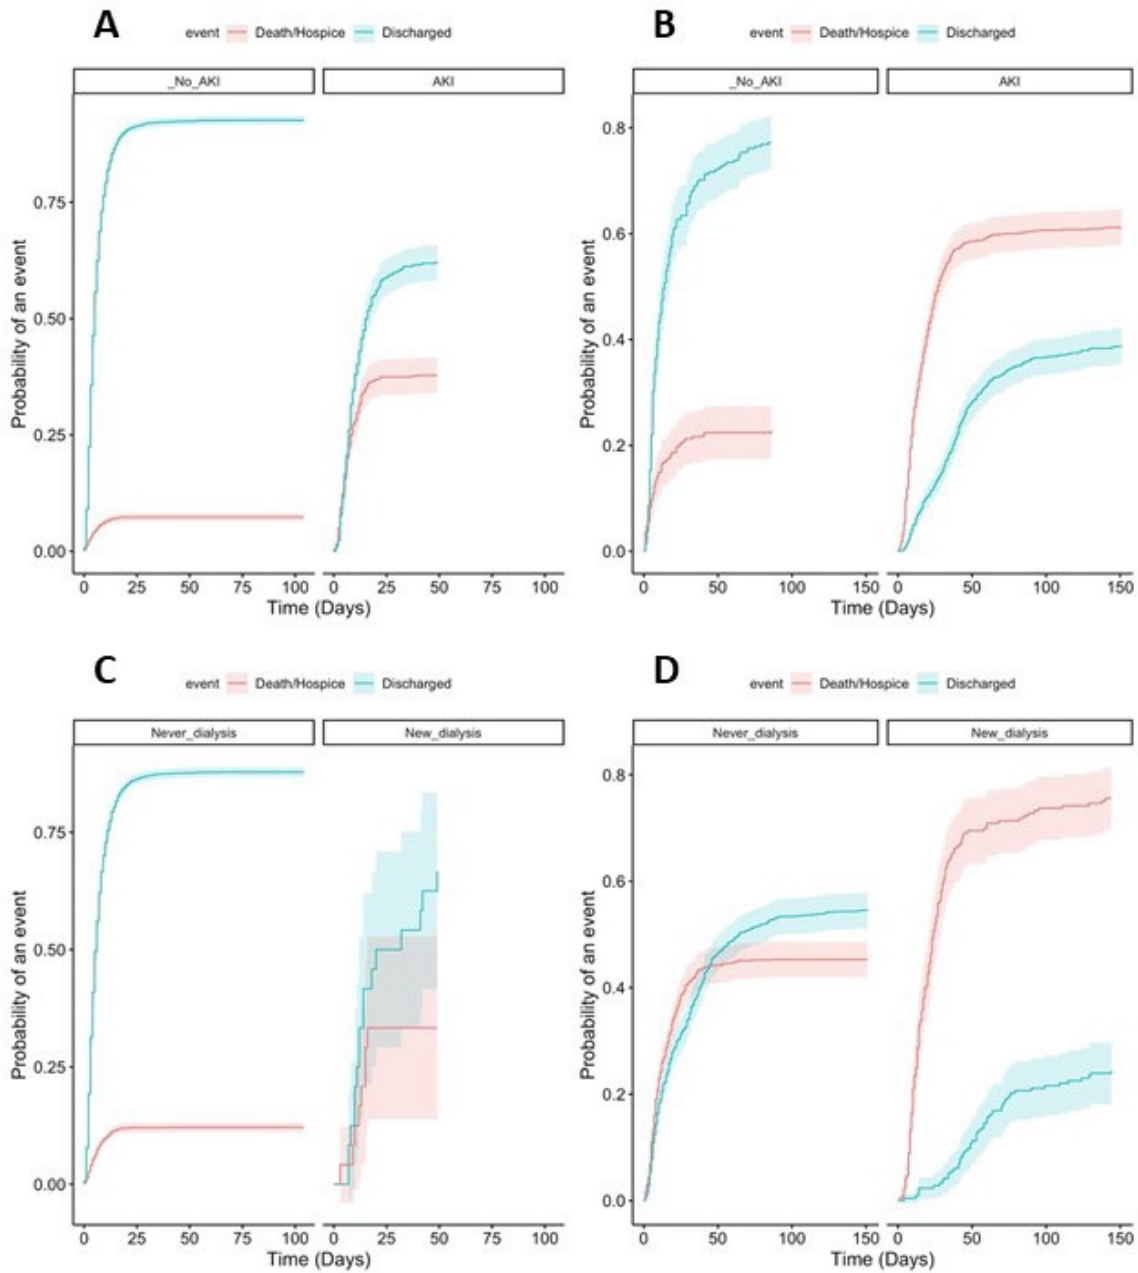

**Supplementary Figure 1.** Time to event for combined mortality and discharge to hospice according AKI or of initiation of RRT, by level of care. A) Non-ICU patients according to presence or absence of any AKI. B) ICU patients according to presence of any AKI. C) Non-ICU patients according dialysis requiring AKI. D) ICU patients according to dialysis requiring AKI. Red-discharged to hospice or died in-hospital. Green discharged alive.
